# Supplementary material for: A Compositional Heterogeneity Analysis of Mitochondrial Phylogenomics in Chalcidoidea Involving Two Newly Sequenced Mitogenomes of Eupelminae (Hymenoptera: Chalcidoidea)
Source: MDPI journal article supplement (doi:10.3390/genes13122340), 2022-12-11
Supplement: s1 [file s1]

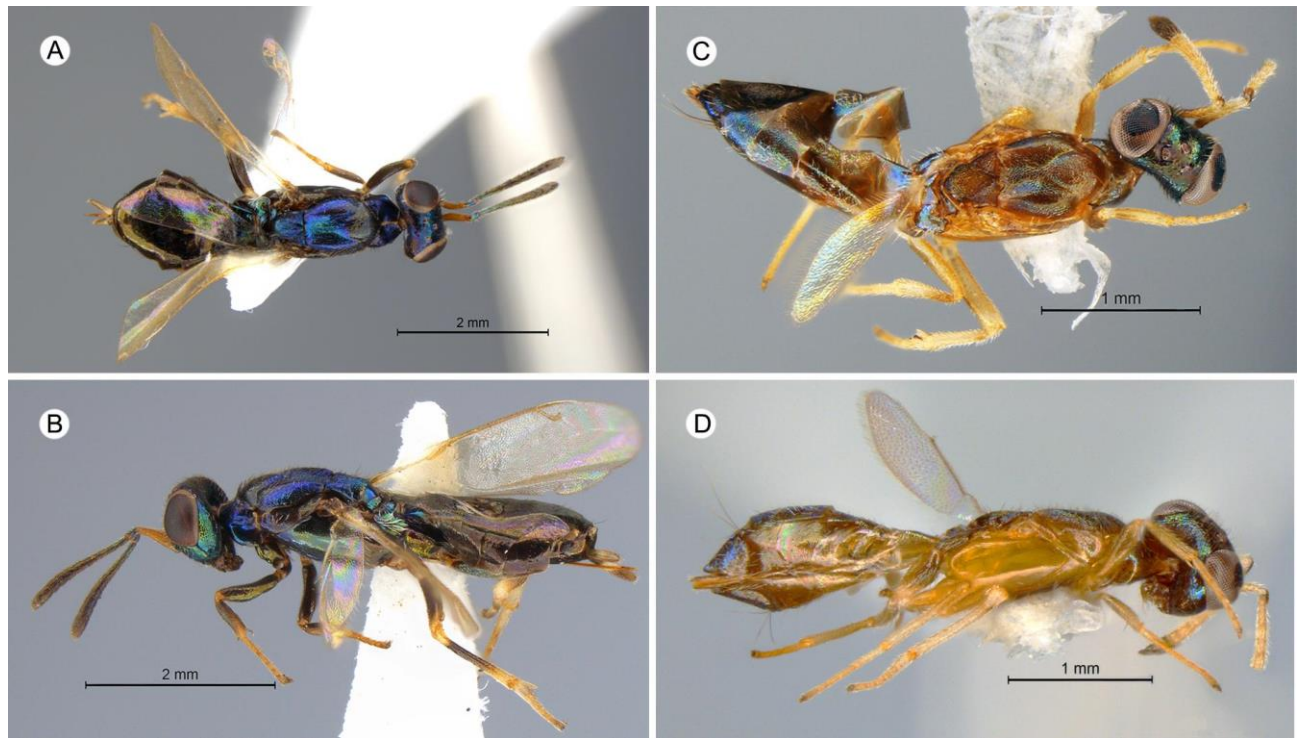

**Figure S1.** Dorsal and lateral views of *Eupelmus anpingensis* and *Merostenus* sp. *Eupelmus anpingensis* (A & B); *Merostenus* sp. (C & D)

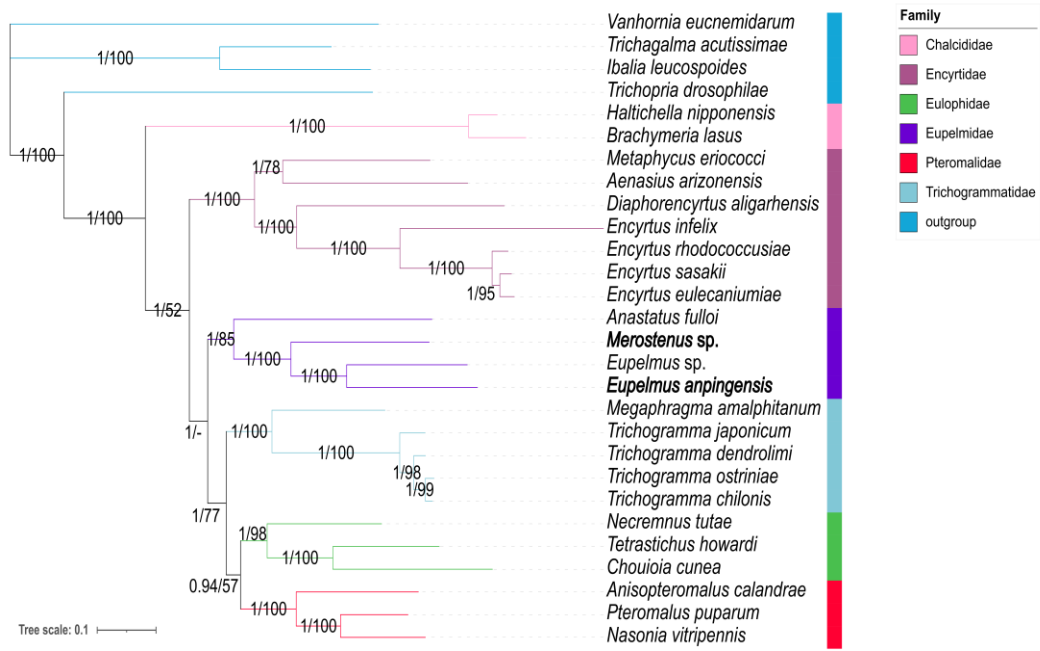

**Figure S2.** Phylogenetic tree inferred from MrBayes and IQ-tree based on the datasets of AA. Supports at nodes (from left to right) are Bayesian posterior probabilities (PP) and ML bootstrap support values (BS).

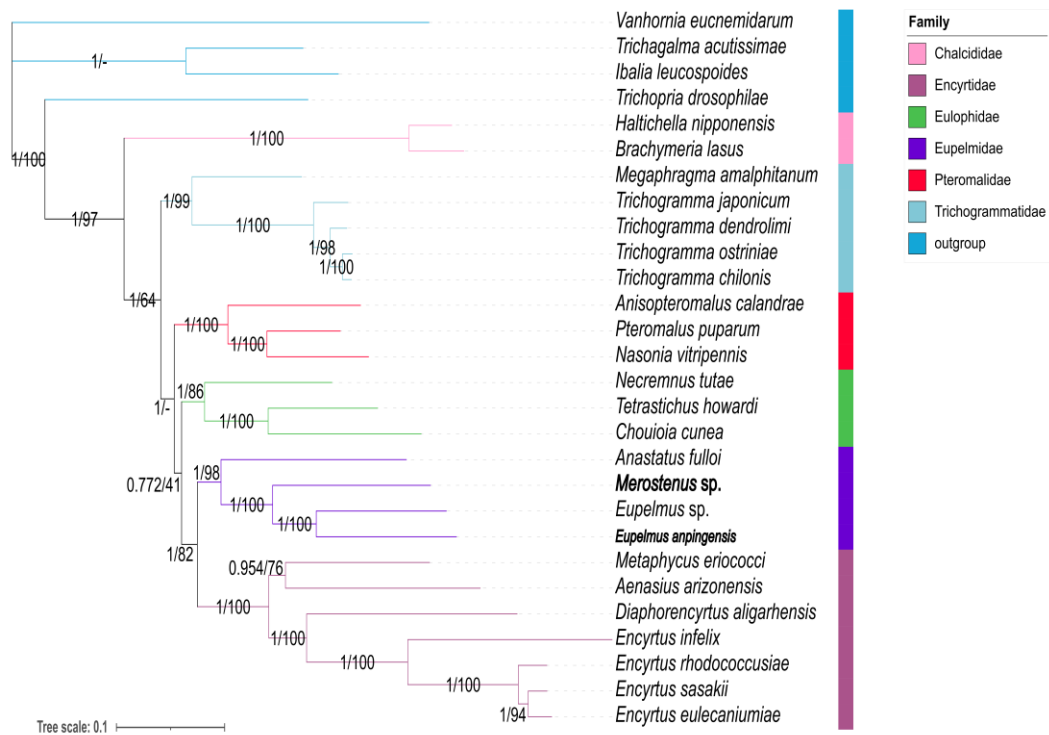

**Figure S3.** Phylogenetic tree inferred from MrBayes and IQ-tree based on the datasets of PCG12. Supports at nodes (from left to right) are Bayesian posterior probabilities (PP) and ML bootstrap support values (BS).

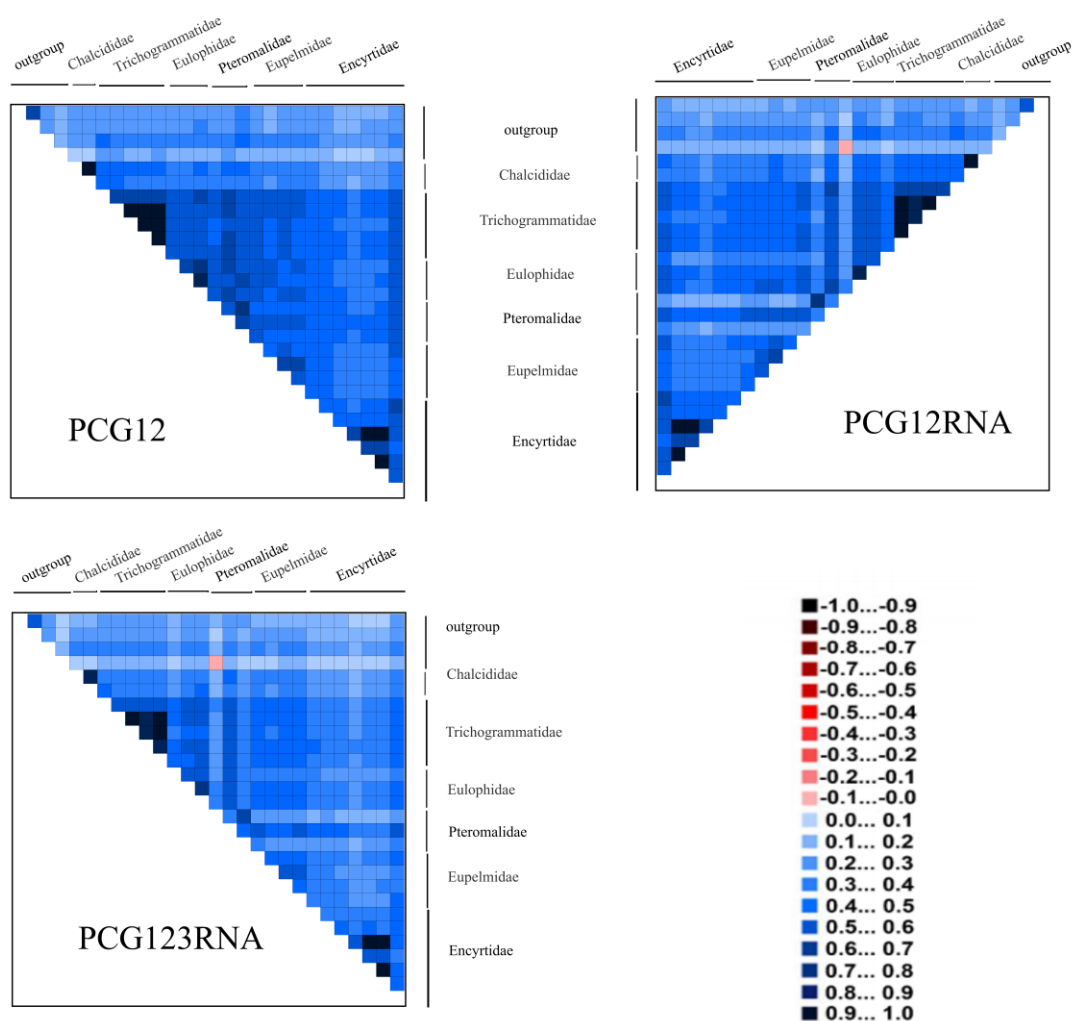

**Figure S4.** Heterogeneous analysis of 28species (including four outgroups) based on PCG12, PCG12RNA and PCG123RNA datasets. The mean similarity score between sequences is represented by a colored square. AliGROOVE score rang from -1, which indicates distances are very different from the average for the entire data matrix (red color), to +1, which indicates distances match the average for the entire matrix (blue color)

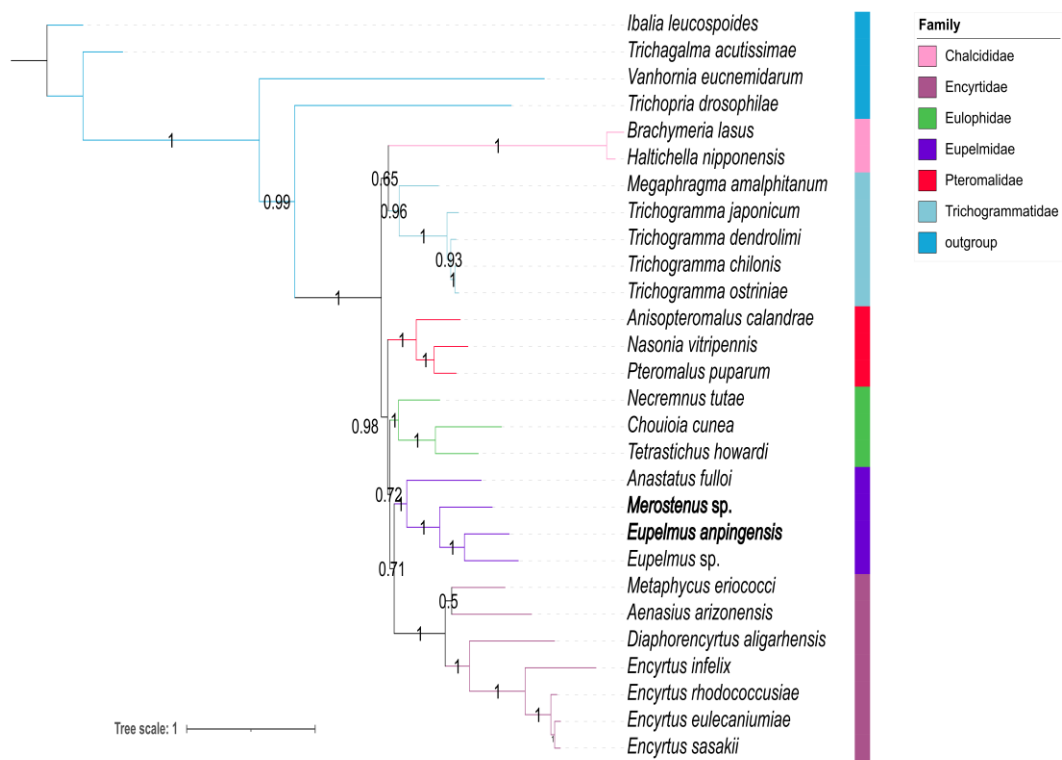

**Figure S5.** Phylogenetic tree inferred from PhyloBayes based on PCGs dataset. Supports at nodes are Bayesian posterior probabilities (PP).

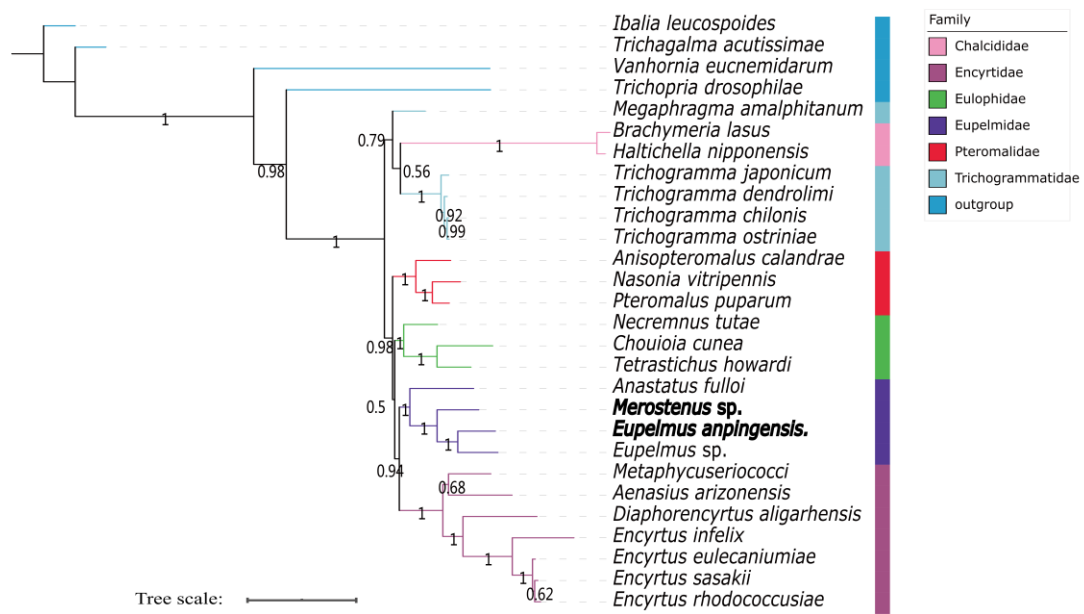

**Figure S6.** Phylogenetic tree inferred from PhyloBayes based on PCG12 dataset. Supports at nodes are Bayesian posterior probabilities (PP).

**Table S1.** Partition strategies used in phylogenetic analysis under site-homogeneous models.

| Software | Datasets  | Partitioning scheme               | Models  | Software | Datasets  | Partitioning scheme               | Models  |
|----------|-----------|-----------------------------------|---------|----------|-----------|-----------------------------------|---------|
| MrBayes  | PCGs      | P1: cox2; cox3; atp6              | GTR+I+G | IQ-tree  | PCGs      | P1: cox2; cox3; atp6              | GTR+I+G |
|          |           | P2: :nad2; atp8                   | GTR+I+G |          |           | P2: nad2; atp8                    | GTR+I+G |
|          |           | P3: cox1                          | GTR+I+G |          |           | P3: cox1                          | GTR+I+G |
|          |           | P4: cytb                          | GTR+I+G |          |           | P4: cytb                          | GTR+I+G |
|          |           | P5: nad4l; nad4; nad5; nad1; nad3 | GTR+I+G |          |           | P5: nad4l; nad4; nad5; nad1; nad3 | GTR+I+G |
|          |           | P6: nad6                          | GTR+I+G |          |           | P6: nad6                          | GTR+I+G |
|          | PCG12     | P1: atp6; cox3                    | GTR+I+G |          | PCG12     | P1: atp6; cox3                    | GTR+I+G |
|          |           | P2: atp8; nad6; nad2              | GTR+I+G |          |           | P2: atp8; nad6; nad2              | GTR+I+G |
|          |           | P3: cox1                          | GTR+I+G |          |           | P3: cox1                          | GTR+I+G |
|          |           | P4: cox2                          | GTR+I+G |          |           | P4: cox2                          | GTR+I+G |
|          |           | P5: cytb                          | GTR+I+G |          |           | P5: cytb                          | GTR+I+G |
|          |           | P6: nad4l; nad1; nad3; nad4; nad5 | GTR+I+G |          |           | P6: nad4l; nad1; nad3; nad4; nad5 | GTR+I+G |
|          | PCG123RNA | P1: cox2; cox3; atp6              | GTR+I+G |          | PCG123RNA | P1: cox2; cox3; atp6              | GTR+I+G |
|          |           | P2: nad2; atp8                    | GTR+I+G |          |           | P2: nad2; atp8                    | GTR+I+G |
|          |           | P3: cox1                          | GTR+I+G |          |           | P3: cox1                          | GTR+I+G |
|          |           | P4: cytb                          | GTR+I+G |          |           | P4: cytb                          | GTR+I+G |
|          |           | P5: nad4l; nad4; nad5; nad1; nad3 | GTR+I+G |          |           | P5: nad4l; nad4; nad5; nad1; nad3 | GTR+I+G |
|          |           | P6: nad6                          | GTR+I+G |          |           | P6: nad6                          | GTR+I+G |
|          | PCG12RNA  | P7: rrnL; rrnS                    | GTR+G   |          | PCG12RNA  | P7: :rrnL; rrnS                   | GTR+G   |
|          |           | P1: atp6; cox3                    | GTR+I+G |          |           | P1: atp6; cox3                    | GTR+I+G |
|          |           | P2: atp8; nad6; nad2              | GTR+I+G |          |           | P2: atp8; nad6; nad2              | GTR+I+G |
|          |           | P3: cox1                          | GTR+I+G |          |           | P3: cox1                          | GTR+I+G |
|          |           | P4: cox2                          | GTR+I+G |          |           | P4: cox2                          | GTR+I+G |

AA

|                                        |           |
|----------------------------------------|-----------|
| P5: cytb                               | GTR+I+G   |
| P6: nad4l; nad1; nad3; nad4; nad5      | GTR+I+G   |
| P7: rrnL; rrnS                         | GTR+G     |
| P1: atp6; nad1; cox3; cox2; cytb; nad3 | MTREV+I+G |
| P2: nad5; nad4; atp8                   | MTREV+I+G |
| P3: cox1                               | MTREV+I+G |
| P4: nad2; nad6; nad4l                  | MTREV+I+G |

AA

|                                        |           |
|----------------------------------------|-----------|
| P5: cytb                               | GTR+I+G   |
| P6: nad4l; nad1; nad3; nad4; nad5      | GTR+I+G   |
| P7: rrnL; rrnS                         | GTR+G     |
| P1: atp6; nad1; cox3; cox2; cytb; nad3 | MTREV+I+G |
| P2: nad5; nad4; atp8                   | MTREV+I+G |
| P3: cox1                               | MTREV+I+G |
| P4: nad2; nad6; nad4l                  | MTREV+I+G |

---



**Table S2.** Features of mitochondrial genome of *Eupelmus anpingensis*.

| Name       | Strand | Location    | Length(bp) | Start<br>codons | Stop<br>codons | Intergenic<br>sequence(bp) |
|------------|--------|-------------|------------|-----------------|----------------|----------------------------|
| trnI(gat)  | J      | 1-67        | 67         |                 |                | 0                          |
| D-loop     | J      | 68-298      | 231        |                 |                | 0                          |
| trnM(cat)  | J      | 299-366     | 68         |                 |                | -1                         |
| trnV(tac)  | J      | 366-430     | 65         |                 |                | 138                        |
| rrnS       | J      | 569-1212    | 644        |                 |                | 3                          |
| trnQ(ttg)  | J      | 1216-1284   | 69         |                 |                | 0                          |
| trnA(tgc)  | J      | 1285-1353   | 69         |                 |                | 11                         |
| rrnL       | J      | 1365-2656   | 1292       |                 |                | -21                        |
| trnL1(tag) | J      | 2636-2701   | 66         |                 |                | 6                          |
| nad1       | J      | 2708-3646   | 939        | ATA             | TAA            | 2                          |
| trnS2(tga) | N      | 3649-3715   | 67         |                 |                | 71                         |
| cob        | N      | 3788-4921   | 1134       | ATG             | TAA            | 1                          |
| nad6       | N      | 4923-5423   | 501        | ATT             | TAA            | 108                        |
| trnT(tgt)  | N      | 5532-5597   | 66         |                 |                | 12                         |
| trnP(tgg)  | J      | 5610-5676   | 67         |                 |                | -15                        |
| nad4L      | J      | 5662-5952   | 291        | ATT             | TAA            | 0                          |
| nad4       | J      | 5953-7281   | 1329       | ATG             | TAA            | -1                         |
| trnH(gtg)  | J      | 7344-7405   | 62         |                 |                | 0                          |
| nad5       | J      | 7406-9088   | 1683       | ATT             | TAA            | -1                         |
| trnF(gaa)  | J      | 9088-9150   | 63         |                 |                | 39                         |
| trnE(ttc)  | N      | 9190-9219   | 30         |                 |                | 11                         |
| cox1       | J      | 9231-10763  | 1533       | ATG             | TAA            | 14                         |
| trnL2(taa) | J      | 10778-10842 | 65         |                 |                | 51                         |
| cox2       | J      | 10894-11565 | 672        | ATT             | TAA            | 0                          |
| trnK(ttt)  | N      | 11566-11630 | 65         |                 |                | -1                         |
| trnD(gtc)  | J      | 11630-11693 | 64         |                 |                | 24                         |
| atp8       | J      | 11718-11879 | 162        | ATT             | TAA            | -1                         |
| atp6       | J      | 11879-12553 | 675        | ATG             | TAG            | 0                          |
| cox3       | J      | 12554-13339 | 786        | ATG             | TAG            | 233                        |
| trnG(tcc)  | J      | 13573-13635 | 63         |                 |                | 2                          |
| trnR(tcg)  | J      | 13638-13703 | 66         |                 |                | 30                         |
| nad3       | J      | 13734-14078 | 345        | ATT             | TAA            | -17                        |
| trnC(gca)  | J      | 14062-14123 | 62         |                 |                | 26                         |
| trnS1(tct) | J      | 14150-14211 | 62         |                 |                | 19                         |
| trnY(gta)  | J      | 14231-14295 | 65         |                 |                | 8                          |
| trnN(gtt)  | N      | 14304-14371 | 68         |                 |                | 11                         |
| trnW(tca)  | N      | 14383-14447 | 65         |                 |                | -2                         |
| nad2       | N      | 14446-15453 | 1008       | ATT             | TAA            | 26                         |

**Table S3.** Features of mitochondrial genome of *Merostenus* sp.

| Name       | Strand | Location    | Length(bp) | Start<br>codons | Stop<br>codons | Intergenic<br>sequence(bp) |
|------------|--------|-------------|------------|-----------------|----------------|----------------------------|
| trnI(gat)  | J      | 1-64        | 64         |                 |                | 0                          |
| D-loop     | J      | 65-765      | 701        |                 |                | 1002                       |
| trnM(cat)  | J      | 1768-1836   | 69         |                 |                | 6                          |
| trnV(tac)  | J      | 1843-1907   | 65         |                 |                | -23                        |
| rrnS       | J      | 1885-2659   | 775        |                 |                | -6                         |
| trnQ(ttg)  | N      | 2654-2720   | 67         |                 |                | 10                         |
| trnA(tgc)  | J      | 2731-2796   | 66         |                 |                | 23                         |
| rrnL       | J      | 2820-4108   | 1289       |                 |                | -23                        |
| trnL1(tag) | J      | 4086-4149   | 64         |                 |                | 0                          |
| nad1       | J      | 4150-5085   | 936        | ATA             | TAA            | 2                          |
| trnS2(tga) | N      | 5088-5153   | 66         |                 |                | 11                         |
| cob        | N      | 5165-6307   | 1143       | ATG             | TAA            | -1                         |
| nad6       | N      | 6307-6810   | 504        | ATT             | TAA            | 42                         |
| trnT(tgt)  | N      | 6853-6917   | 65         |                 |                | 25                         |
| trnP(tgg)  | J      | 6943-7005   | 63         |                 |                | -12                        |
| nad4L      | J      | 6994-7281   | 288        | ATT             | TAA            | -1                         |
| nad4       | J      | 7281-8615   | 1335       | ATG             | TAA            | 0                          |
| trnH(gtg)  | J      | 8616-8679   | 64         |                 |                | 54                         |
| nad5       | J      | 8734-10350  | 1617       | ATT             | TAA            | 2                          |
| trnF(gaa)  | J      | 10353-10414 | 62         |                 |                | 21                         |
| trnE(ttc)  | N      | 10436-10498 | 63         |                 |                | 0                          |
| cox1       | J      | 10499-12031 | 1533       | ATG             | TAA            | 2                          |
| trnL2(taa) | J      | 12034-12099 | 66         |                 |                | 0                          |
| cox2       | J      | 12100-12786 | 687        | ATT             | TAA            | -13                        |
| trnK(ttt)  | N      | 12774-12838 | 65         |                 |                | -1                         |
| trnD(gtc)  | J      | 12838-12902 | 65         |                 |                | 5                          |
| atp8       | J      | 12908-13069 | 162        | ATT             | TAA            | -1                         |
| atp6       | J      | 13069-13743 | 675        | ATG             | TAA            | -1                         |
| cox3       | J      | 13743-14528 | 786        | ATG             | TAA            | 6                          |
| trnG(tcc)  | J      | 14535-14597 | 63         |                 |                | 6                          |
| trnR(tcg)  | J      | 14604-14668 | 65         |                 |                | 22                         |
| nad3       | J      | 14691-15041 | 351        | ATT             | TAA            | 0                          |
| trnC(gca)  | J      | 15042-15108 | 67         |                 |                | -2                         |
| trnN(gtt)  | N      | 15107-15171 | 65         |                 |                | 0                          |
| trnS1(tct) | J      | 15172-15228 | 57         |                 |                | 0                          |
| trnY(gta)  | J      | 15229-15294 | 66         |                 |                | -2                         |
| trnW(tca)  | N      | 15293-15355 | 63         |                 |                | -2                         |
| nad2       | N      | 15354-16358 | 1005       | ATT             | TAA            | 12                         |
